# Supplementary material for: Generating bioactive and antiseptic interfaces with nano-silver hydroxyapatite-based coatings by pulsed electrochemical deposition for long-term efficient cervical soft tissue sealing
Source: Royal Society of Chemistry journal article supplement (doi:10.1039/d2tb02098j), 2022-11-29
Supplement: d2tb02098j3.pdf [file d2tb02098j3.pdf]

## Supplementary Material

### Materials and Methods

Peri-implantitis is a biofilm-induced inflammatory process that Gram-negative anaerobic rods dominate those biofilms[1]. A single evaluation time point was used to primarily detect the antibacterial concentration of  $\text{Ag}^+$ . A peri-implantitis subject was diagnosed and selected by a professional prosthodontist from department of dental implant, West China Hospital of Stomatology. Biofluid was obtained from the peri-implant pocket using a blunt metal probe (diameter 0.7 mm) and then equivalently inoculated onto modified salmonella shigella agar with 5% goat blood and 1-10‰  $\text{AgNO}_3$  (wt‰). Culture dishes were incubated at 37° C under anaerobic conditions (10%  $\text{H}_2$  and 5%  $\text{CO}_2$  in  $\text{N}_2$ ) for 3 days[2]. Each sample was then divided and subjected to macroscopic colony analysis. Meanwhile, 200 uL of *P. gingivalis* ATCC 33277 was separately grown in 10ml brain heart infusion supplemented with 0.5 ug/mL Vitamin K1, 5 ug/mL Hemin and 1-10‰  $\text{AgNO}_3$ . After 3 days of cultivation, centrifuged and re-suspended in 10 ml of PBS for OD test. The bacterial culture and OD test were performed as previously described[3]. At least 3 parallel tests were set for all measurements.

### Results

After 3 days' cultivation, lots of black bacterial colonies were detected in negative control. Compared with negative control, 4‰  $\text{Ag}^+$  concentration exhibited some bacteriostatic activity while almost no black colonies were found in 10‰  $\text{AgNO}_3$  group (Fig 1SA). In short, the amount of bacterial colonies was negatively correlated with the concentration of  $\text{Ag}^+$ . Meanwhile, the OD results of the *P. gingivalis* amount revealed the same trend. Compared with negative and 1‰ group, 4‰-10‰  $\text{Ag}^+$  concentration obviously inhibited the *P. gingivalis* growth. Especially in 7‰ and 10‰ group, there were almost no significant differences compared with the black group (Fig 1SB).

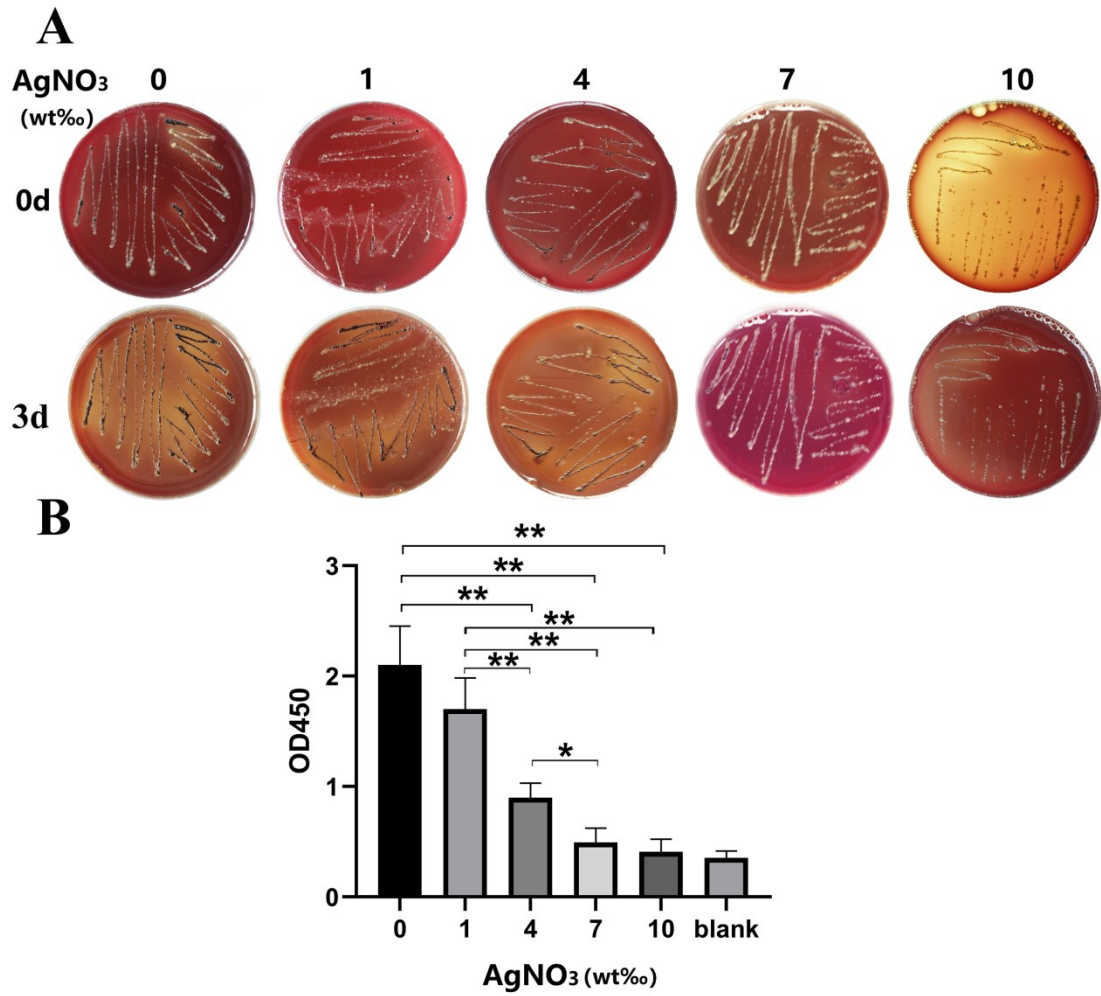

**Fig. S1:** Different Ag<sup>+</sup> concentration on the bacterial proliferation of peri-implantitis in vitro. (A) the impact of various Ag<sup>+</sup> concentrations on the bacterial proliferation from peri-implantitis pocket in vitro. (B) the OD test of various Ag<sup>+</sup> concentrations on the *P. gingivalis* proliferation. \*:P < 0.05, \*\*:P < 0.01.

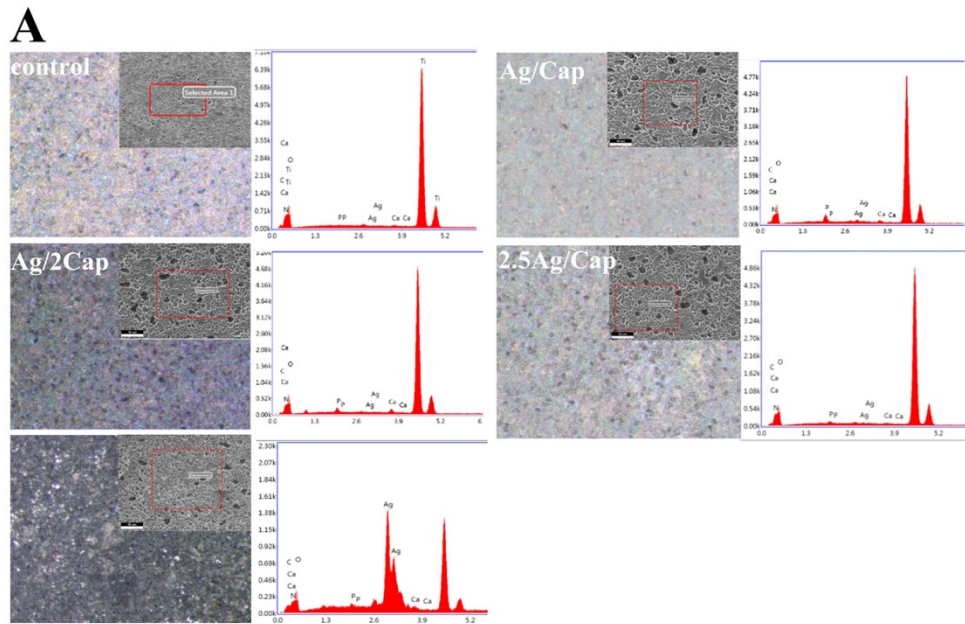

**B**

| Wt%(n=4)   | Ag         | Ca         | P         |
|------------|------------|------------|-----------|
| control    | 0.01±0.01  | 0.43±0.12  | 0.04±0.02 |
| 0.5Ag/Cap  | 2.18±0.14  | 5.66±0.05  | 3.19±0.11 |
| 0.5Ag/2Cap | 3.22±0.06  | 7.4±0.11   | 3.73±0.13 |
| Ag/Cap     | 3.45±0.04  | 8.09±0.08  | 4.37±0.07 |
| Ag/2Cap    | 5.58±0.18  | 10.42±0.12 | 6.73±0.13 |
| 1.5Ag/Cap  | 6.62±0.1   | 17.22±0.21 | 8.48±0.15 |
| 1.5Ag/2Cap | 7.76±0.11  | 19.44±0.12 | 9.36±0.06 |
| 2Ag/Cap    | 11.48±0.12 | 20.61±0.14 | 10.3±0.24 |

**Fig. S2:** the EDS results of various coatings with different Ag/CaP concentration and corresponding mass fraction

## Reference

- [1] F. Schwarz, J. Derks, A. Monje, H.L. Wang, Peri-implantitis, *J Periodontol* 89 Suppl 1 (2018) S267-S290.
- [2] J. Neilands, C. Wickstrom, B. Kinnby, J.R. Davies, J. Hall, B. Friberg, G. Svensater, Bacterial profiles and proteolytic activity in peri-implantitis versus healthy sites, *Anaerobe* 35(Pt A) (2015) 28-34.
- [3] Y. Huang, J. Zeng, G. Chen, X. Xie, W. Guo, W. Tian, Periodontitis contributes to adipose tissue inflammation through the NF- $\kappa$ B, JNK and ERK pathways to promote insulin resistance in a rat model, *Microbes Infect* 18(12) (2016) 804-812.
